# Supplementary material for: Two-dimensional Be2Al and Be2Ga monolayer: anti-van’t Hoff/Le Bel planar hexacoordinate bonding and superconductivity
Source: Royal Society of Chemistry journal article supplement (doi:10.1039/d2cp04595h), 2022-11-29
Supplement: d2cp04595h1.pdf [file d2cp04595h1.pdf]

**Supporting Information For**

**Two-dimensional Be<sub>2</sub>Al and Be<sub>2</sub>Ga monolayer: an anti-van't Hoff/Le Bel planar hexacoordinate bonding and superconductivity**

Hai-xia Li,<sup>a#</sup> Meng-hui Wang,<sup>a#</sup> Quan Li,<sup>b</sup> and Zhong-hua Cui<sup>\*a,c</sup>

*<sup>a</sup>Institute of Atomic and Molecular Physics, Jilin University, Changchun 130023, China*

*E-mail: zcui@jlu.edu.cn*

*<sup>b</sup>State Key Laboratory of Superhard Materials, College of Physics, Jilin University, Changchun 130023, People's Republic of China*

*<sup>c</sup>Key Laboratory of Physics and Technology for Advanced Batteries (Ministry of Education), Jilin University, Changchun 130023, China*

#These authors contributed equally to this work

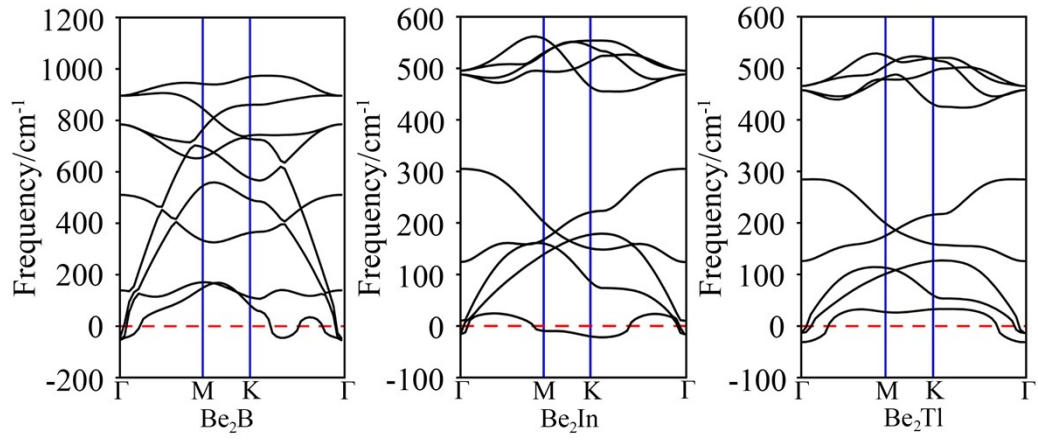

**Figure S1.** Phonon dispersion of the Be<sub>2</sub>B, Be<sub>2</sub>In, and Be<sub>2</sub>Tl monolayers.

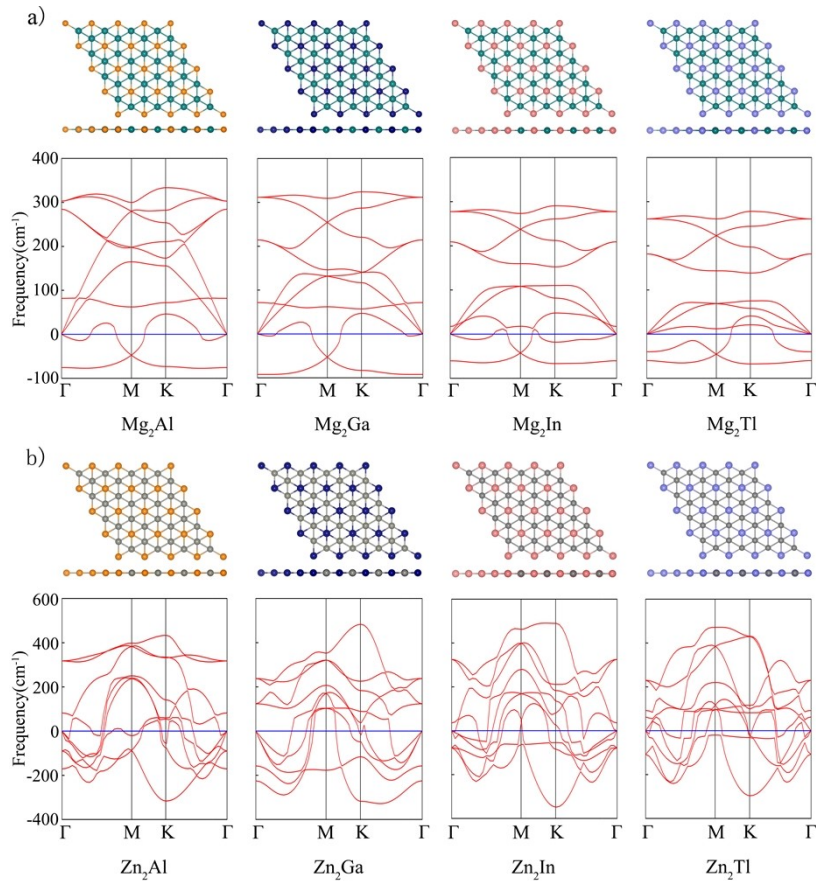

**Figure S2.** The crystal structure of  $Ae_2M$  ( $Ae = Mg, Zn; M = Al, Ga$ ) monolayer and the corresponding phonon dispersion curves.

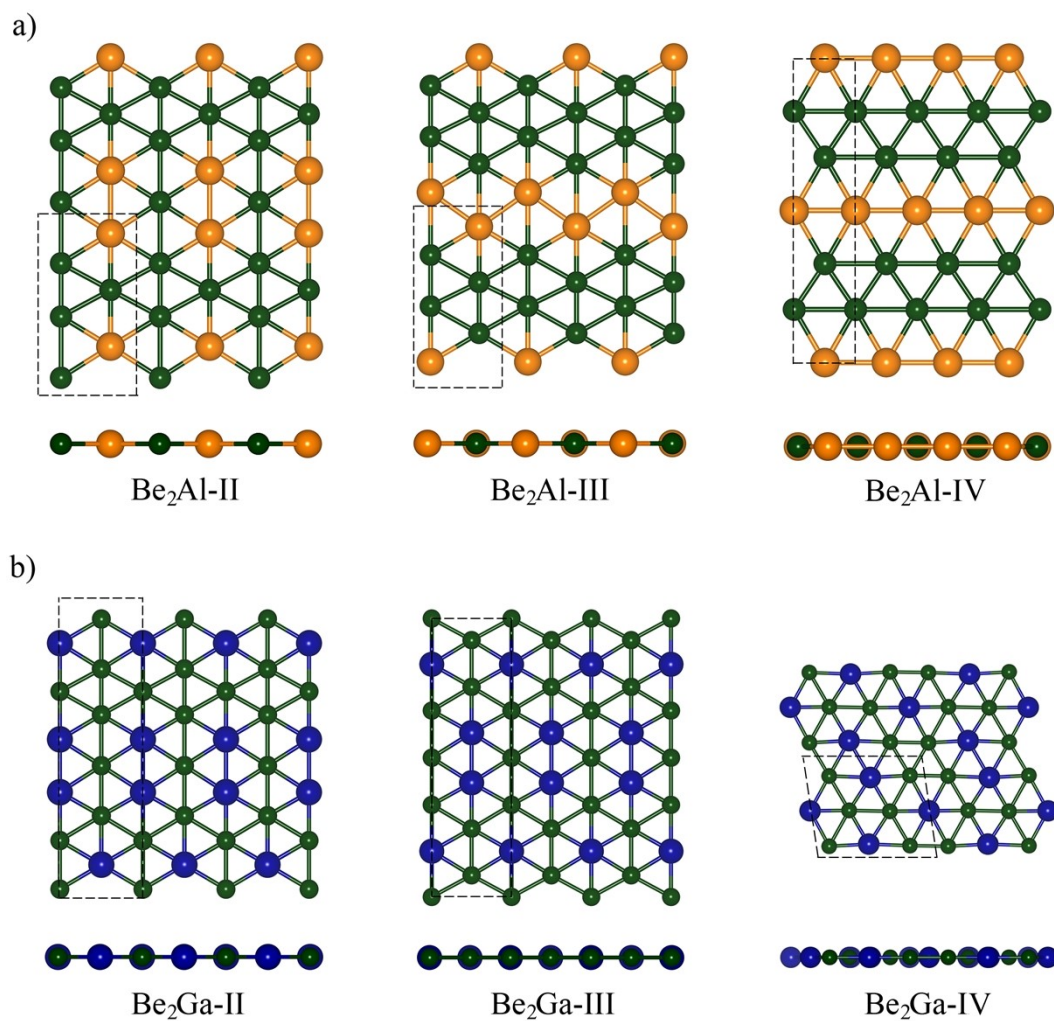

**Figure S3.** Top and side views of low-lying structures of a) Be<sub>2</sub>Al and b) Be<sub>2</sub>Ga 2D monolayers confirmed by particle swarm searches. The green, yellow, and blue balls represent Be, Al, and Ga atoms, respectively.

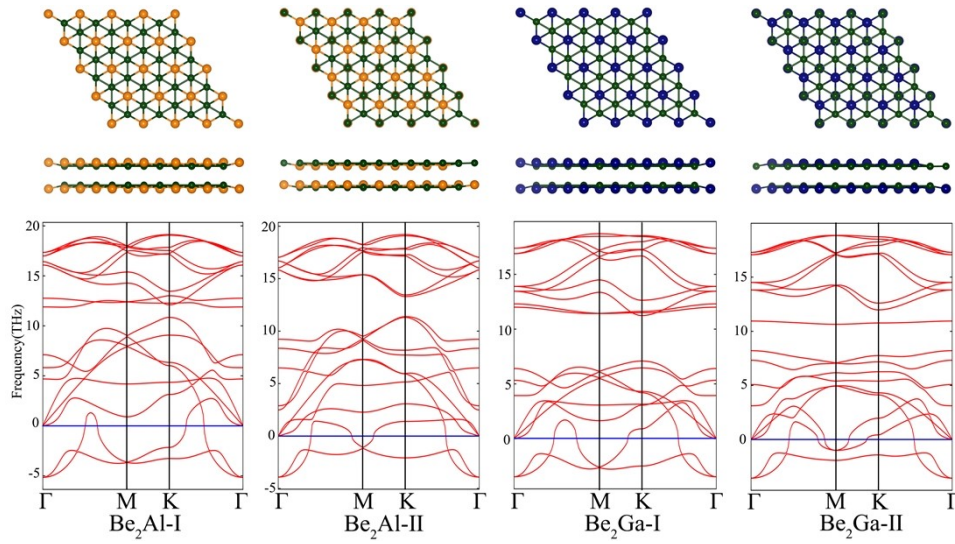

**Figure S4.** The crystal structure and phonon dispersion curves of Be<sub>2</sub>M (M = Al, Ga) bilayer.

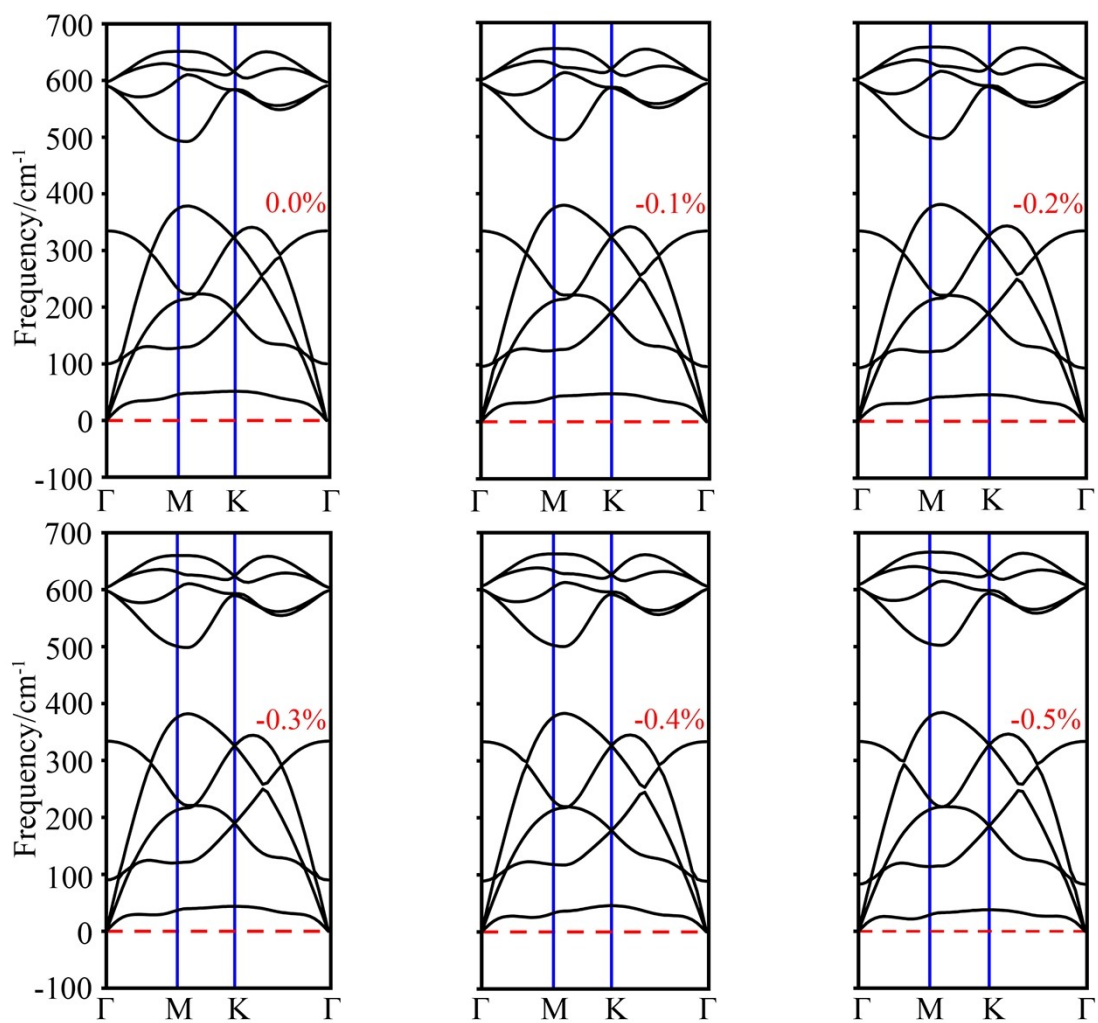

**Figure S5.** Phonon dispersion spectra of Be<sub>2</sub>Al under strain from -0.5% to 0%.

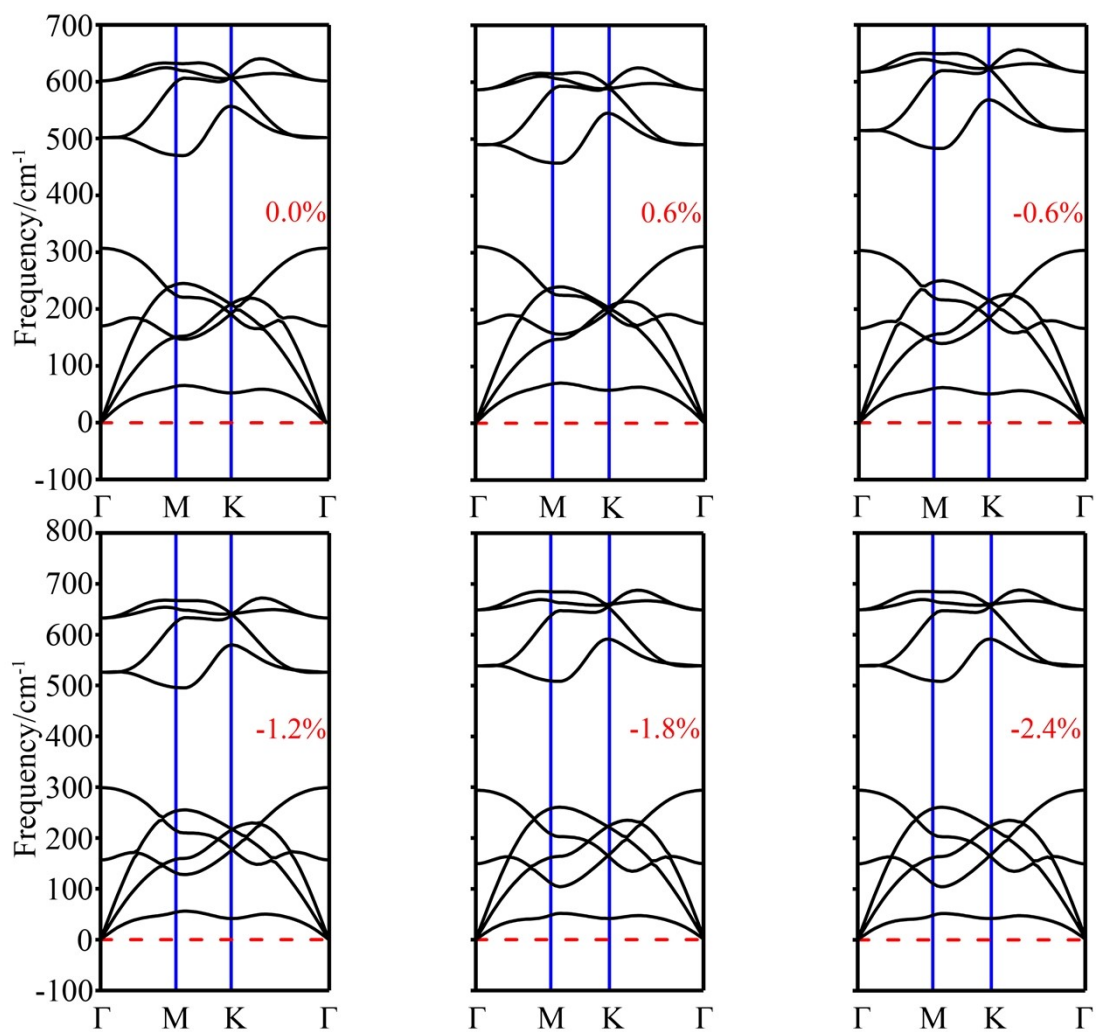

**Figure S6.** Phonon dispersion spectra of Be<sub>2</sub>Ga under strain from -2.4% to 0.6%.



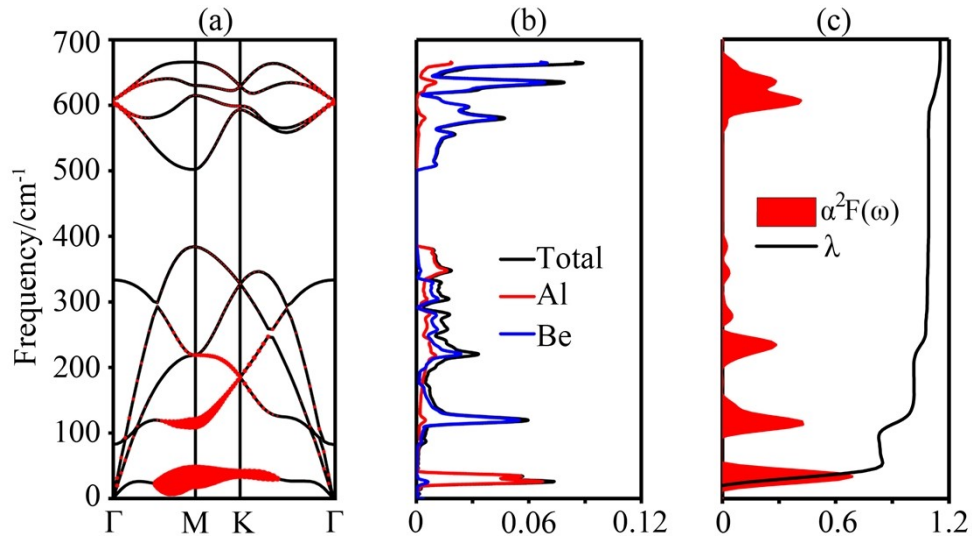

**Figure S7.** (a) Phonon dispersion with electron-phonon coupling strength, (b) phonon density of states (PhDOS), (c) Eliashberg spectral function  $\alpha^2F(\omega)$  and the overall electron-phonon coupling strength  $\lambda(\omega)$  of  $\text{Be}_2\text{Al}$  under the strain of -0.5%.



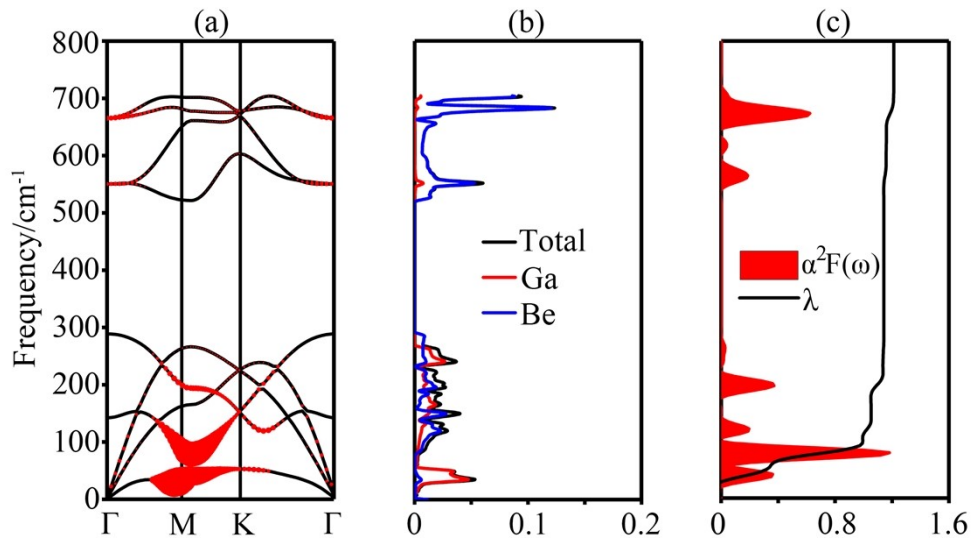

**Figure S8.** (a) Phonon dispersion with electron-phonon coupling strength, (b) phonon density of states (PhDOS), (c) Eliashberg spectral function  $\alpha^2F(\omega)$  and the overall electron-phonon coupling strength  $\lambda(\omega)$  of Be<sub>2</sub>Ga under the strain of -2.4%.

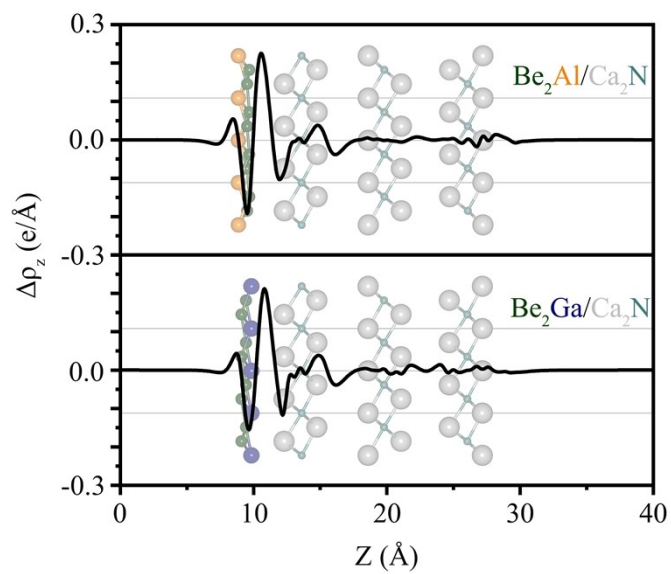

**Figure S9.** Plane-averaged charge density difference along the vertical  $z$ -direction to the  $\text{Be}_2\text{M}$  ( $\text{M} = \text{Al}, \text{Ga}$ ) monolayer and the  $\text{Ca}_2\text{N}$  substrate.

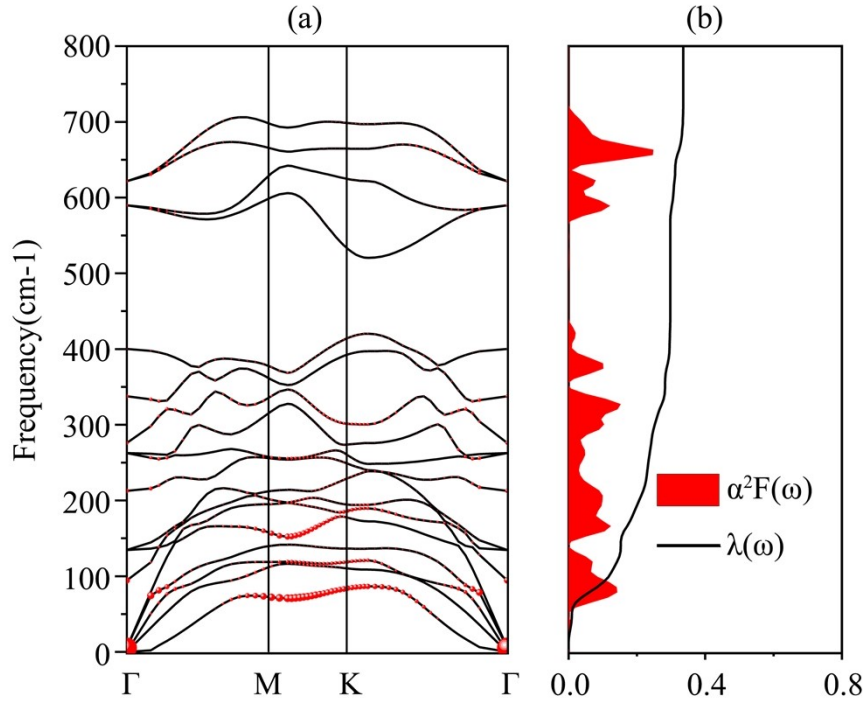

**Figure S10.** (a) Phonon dispersion with electron-phonon coupling strength, (b) Eliashberg spectral function  $\alpha^2F(\omega)$  and the overall electron-phonon coupling strength  $\lambda(\omega)$  of the Be<sub>2</sub>Al-Ca<sub>2</sub>N bilayer.

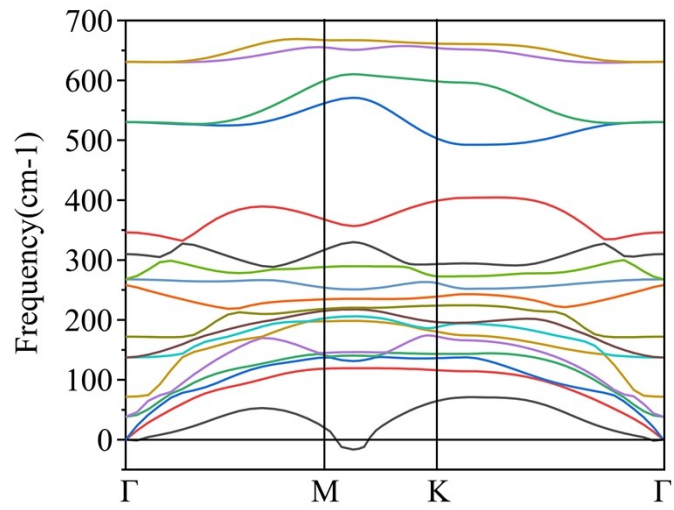

**Figure S11.** Phonon dispersion of the Be<sub>2</sub>Ga-Ca<sub>2</sub>N bilayer.
